# Supplementary material
Source: PubMed Central journal article supplement (PMC5920704)

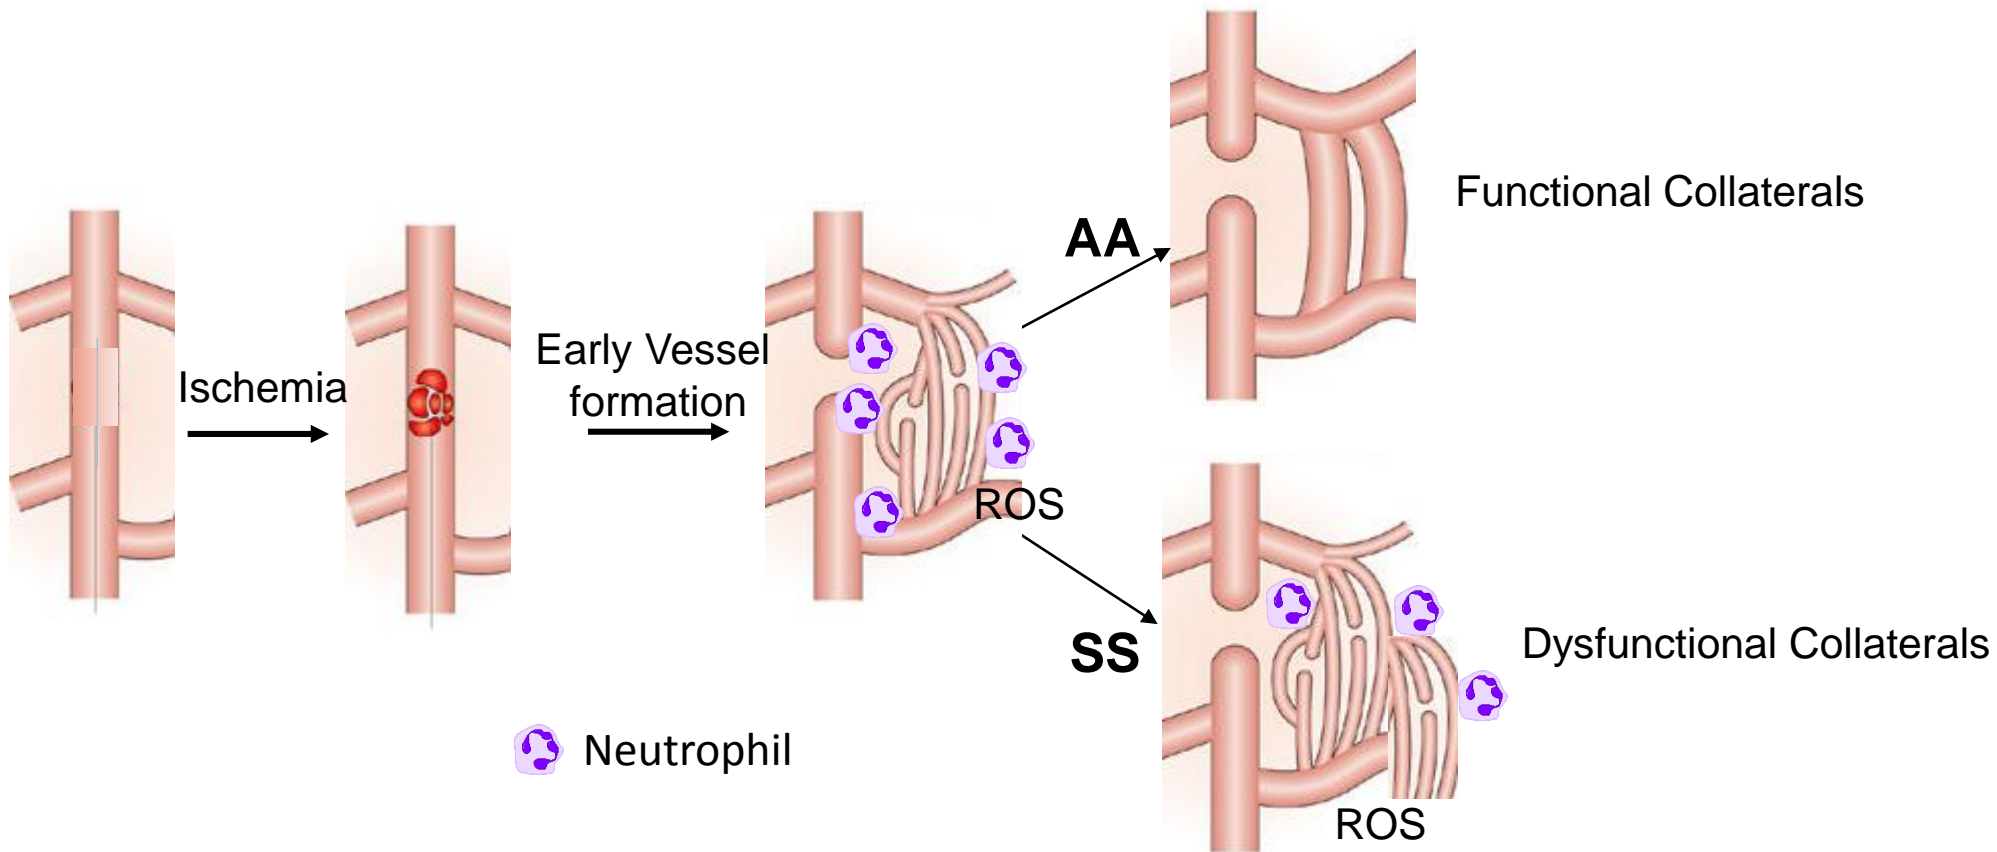

Supplement: NIHMS947524-supplement-Graphic_Abstract.pdf [file NIHMS947524-supplement-Graphic_Abstract.pdf]
